# Supplementary material
Source: ML conference proceedings conference paper supplement (https://openaccess.thecvf.com/content/ACCV2020/html/Son_SAUM_Symmetry-Aware_Upsampling_ACCV_2020_paper.html)
Supplement: Supplementary file 1 [file Son_SAUM_Symmetry-Aware_Upsampling_ACCV_2020_supplemental.pdf]

# Supplementary Material for SAUM: Symmetry-Aware Upsampling Module for Consistent Point Cloud Completion

Hyeontae Son and Young Min Kim

Department of ECE, Seoul National University

This document is the supplementary material of the Paper SAUM. Section 1 contains further implementation details and is followed by Section 2 with additional quantitative results as an extension of Section 4 and 5 of the main paper.

## 1 Experimental Setting

### 1.1 Point Cloud Completion

While the main paper contains quantitative results with the entire dataset, we provide the categorical results of point cloud completion. In this section, we remind you of the experimental setting in the main paper and report the detailed network architecture of the decoders. Basically, we evaluated the shape completion results based on the three metrics proposed in Section 4.2 of the main paper: Chamfer Distance, Earth Mover’s Distance, and F-Score. We used farthest point sampling to sample the same number of points for the output of ours and the provided ground truth for the fair comparison. We chose  $d$  for the F-Score roughly around the mean Chamfer Distance.

**PCN dataset.** All decoders are designed to generate  $M = 16384$  points. Followings are detailed network architectures of the decoders.

- **FCAE** contains 3 fully-connected layers with 1024, 1024, and  $16384 \cdot 3$  units.
- **AtlasNet** contains 16 MLP branches. Each branch is implemented as a 3-layer shared-MLP with 256, 256, and 3 units, deforming a 2D  $32 \times 32$  grid to 1024 3D points.
- **PCN** has 3 fully-connected layers with 1024, 1024, and  $1024 \cdot 3$  units for generating coarse points, and the following 1 folding layer for upsampling the coarse output by  $16 \times$ .
- **TopNet** has 8 tree levels and the number of children per level is 2, 2, 4, 4, 4, 4, 4, 4. Each node of the tree is a 8-dimensional feature vector.

We sampled  $M$  points from the output of the SAUM-attached models. For the F-Score, we selected  $d = 10 \times 10^{-3}$  near the mean Chamfer Distance of the decoder-only models.

**TopNet dataset.** All decoders are designed to generate  $M = 2048$  points. Followings are detailed network architectures of the decoders.

- **FCAE** contains 3 fully-connected layers with 1024, 1024, and  $2048 \cdot 3$  units.
- **AtlasNet** contains 16 MLP branches. Each branch is implemented as a 3-layer shared-MLP with 256, 256, and 3 units, deforming a 2D  $16 \times 8$  grid to 128 3D points.
- **PCN** has 3 fully-connected layers with 1024, 1024, and  $512 \cdot 3$  units for generating coarse points, and the following 1 folding layer for upsampling the coarse output by  $4 \times$ .
- **TopNet** has 8 tree levels and the number of children per level is 2, 2, 2, 2, 4, 4, 4. Each node of the tree is a 8-dimensional feature vector.

We sampled  $M$  points from the output of the SAUM-attached models. For the F-Score, we selected  $d = 20 \times 10^{-3}$  near the mean Chamfer Distance of the decoder-only models.

## 1.2 Self-Consistency Test

On the PCN dataset, we pass the ground truth shape to the completion networks and compare it with the output for evaluating the consistency of the networks. We provide the categorical results of the self-consistency test with the same metrics: CD, EMD, F-Score. We sampled 16384 points from the output of the SAUM-attached models for the fair comparison. For the F-Score, we chose  $d = 10 \times 10^{-3}$  following the same setting of the completion experiments.

## 1.3 Ablation Study

On the PCN dataset, we evaluate the performance of the networks with different settings. First, we compare the SAUM-only models, decoder-only models, and two-branch models. Second, we test the models with the different upsampling ratio  $r$ . We provide the categorical results of the ablation study with the same metrics: CD, EMD, F-Score. We sampled 16384 points from the output of the SAUM-attached models for the fair comparison. For the F-Score, we chose  $d = 10 \times 10^{-3}$  following the same setting of the previous experiments.

## 2 Results

The per-category results of the aforementioned setting are presented in this Section. The last column contains the mean values of the entire categories as reported in the main paper. While there might be rare exceptions, the overall result shows that the combination of SAUM and decoder is superior to the conventional approaches for shape completion. The argument can be further verified by the ability to transfer the structure for the self-consistency test. We also note that the higher upsampling ratio results in a stronger performance.

## 2.1 Point Cloud Completion

| Methods       | Chair         | Table        | Sofa          | Cabinet       | Lamp         | Car          | Airplane     | Vessel       | Avg          |
|---------------|---------------|--------------|---------------|---------------|--------------|--------------|--------------|--------------|--------------|
| FCAE          | 10.969        | 9.320        | 11.756        | 11.023        | 11.131       | 8.775        | 5.698        | 9.720        | 9.799        |
| FCAE+SAUM     | <b>9.524</b>  | <b>8.011</b> | <b>11.115</b> | <b>10.105</b> | <b>8.848</b> | <b>8.515</b> | <b>5.088</b> | <b>8.141</b> | <b>8.668</b> |
| AtlasNet      | 10.803        | 8.979        | 11.472        | 10.946        | 11.212       | 9.009        | 5.757        | 9.740        | 9.739        |
| AtlasNet+SAUM | <b>9.604</b>  | <b>8.273</b> | <b>11.279</b> | <b>10.310</b> | <b>8.553</b> | <b>8.752</b> | <b>4.995</b> | <b>8.032</b> | <b>8.725</b> |
| PCN           | 10.998        | 8.590        | 11.676        | 10.625        | 11.339       | 8.696        | 5.502        | 9.665        | 9.636        |
| PCN+SAUM      | <b>10.024</b> | <b>8.148</b> | <b>11.452</b> | <b>10.149</b> | <b>9.228</b> | <b>8.645</b> | <b>5.017</b> | <b>8.540</b> | <b>8.900</b> |
| TopNet        | 10.664        | 8.756        | 11.682        | 10.624        | 11.210       | 8.948        | 5.659        | 9.551        | 9.637        |
| TopNet+SAUM   | <b>9.079</b>  | <b>7.677</b> | <b>11.055</b> | <b>10.038</b> | <b>7.564</b> | <b>8.570</b> | <b>4.975</b> | <b>7.568</b> | <b>8.316</b> |

Table 1: Quantitative results on the PCN dataset. The Chamfer Distance (CD) multiplied by  $10^3$  is reported. The lower the CD, the better. Better results are in bold.

| Methods       | Chair         | Table        | Sofa          | Cabinet      | Lamp          | Car          | Airplane     | Vessel       | Avg           |
|---------------|---------------|--------------|---------------|--------------|---------------|--------------|--------------|--------------|---------------|
| FCAE          | 18.973        | 16.112       | 19.149        | 21.472       | 24.055        | 15.730       | 7.356        | 14.178       | 17.128        |
| FCAE+SAUM     | <b>8.951</b>  | <b>7.158</b> | <b>10.306</b> | <b>9.779</b> | <b>12.811</b> | <b>7.968</b> | <b>6.627</b> | <b>8.522</b> | <b>9.015</b>  |
| AtlasNet      | 22.547        | 16.296       | 17.886        | 23.167       | 29.198        | 11.695       | 11.678       | 13.894       | 18.295        |
| AtlasNet+SAUM | <b>8.592</b>  | <b>6.776</b> | <b>9.254</b>  | <b>9.442</b> | <b>13.146</b> | <b>6.315</b> | <b>5.917</b> | <b>8.043</b> | <b>8.436</b>  |
| PCN           | 8.679         | 8.078        | 8.342         | 9.769        | 16.954        | 5.718        | 4.664        | 7.509        | 8.714         |
| PCN+SAUM      | <b>6.628</b>  | <b>6.017</b> | <b>7.308</b>  | <b>7.180</b> | <b>9.852</b>  | <b>5.576</b> | <b>4.493</b> | <b>5.990</b> | <b>6.631</b>  |
| TopNet        | <b>13.738</b> | 9.707        | 11.816        | 11.374       | 22.523        | 7.831        | <b>8.620</b> | 12.037       | 12.206        |
| TopNet+SAUM   | 14.079        | <b>7.634</b> | <b>11.377</b> | <b>8.336</b> | <b>15.297</b> | <b>7.034</b> | 10.215       | <b>9.796</b> | <b>10.471</b> |

Table 2: Quantitative results on the PCN dataset. The Earth Mover’s Distance (EMD) multiplied by  $10^2$  is reported. The lower the EMD, the better. Better results are in bold.

| Methods       | Chair        | Table        | Sofa         | Cabinet      | Lamp         | Car          | Airplane     | Vessel       | Avg          |
|---------------|--------------|--------------|--------------|--------------|--------------|--------------|--------------|--------------|--------------|
| FCAE          | 0.576        | 0.697        | 0.509        | 0.574        | 0.594        | 0.706        | 0.876        | 0.672        | 0.651        |
| FCAE+SAUM     | <b>0.702</b> | <b>0.814</b> | <b>0.604</b> | <b>0.660</b> | <b>0.760</b> | <b>0.735</b> | <b>0.906</b> | <b>0.775</b> | <b>0.745</b> |
| AtlasNet      | 0.610        | 0.734        | 0.544        | 0.594        | 0.617        | 0.698        | 0.869        | 0.682        | 0.669        |
| AtlasNet+SAUM | <b>0.704</b> | <b>0.807</b> | <b>0.616</b> | <b>0.659</b> | <b>0.773</b> | <b>0.725</b> | <b>0.909</b> | <b>0.780</b> | <b>0.747</b> |
| PCN           | 0.625        | 0.765        | 0.581        | 0.651        | 0.638        | 0.725        | 0.881        | 0.697        | 0.695        |
| PCN+SAUM      | <b>0.686</b> | <b>0.809</b> | <b>0.616</b> | <b>0.681</b> | <b>0.739</b> | <b>0.734</b> | <b>0.906</b> | <b>0.759</b> | <b>0.741</b> |
| TopNet        | 0.602        | 0.742        | 0.542        | 0.624        | 0.594        | 0.696        | 0.874        | 0.673        | 0.668        |
| TopNet+SAUM   | <b>0.710</b> | <b>0.821</b> | <b>0.605</b> | <b>0.674</b> | <b>0.808</b> | <b>0.731</b> | <b>0.907</b> | <b>0.794</b> | <b>0.756</b> |

Table 3: Quantitative results on the PCN dataset. The F-Score is reported. The higher the F-Score, the better. Better results are in bold.

| Methods       | Chair         | Table         | Sofa          | Cabinet       | Lamp          | Car           | Airplane      | Vessel        | Avg           |
|---------------|---------------|---------------|---------------|---------------|---------------|---------------|---------------|---------------|---------------|
| FCAE          | 25.250        | 25.802        | 23.737        | 27.007        | 26.285        | 17.944        | 11.109        | 19.156        | 22.036        |
| FCAE+SAUM     | <b>23.332</b> | <b>24.932</b> | <b>22.130</b> | <b>24.980</b> | <b>22.306</b> | <b>17.794</b> | <b>10.120</b> | <b>16.767</b> | <b>20.295</b> |
| AtlasNet      | 24.735        | 25.275        | 23.311        | 27.044        | 25.797        | 18.224        | 11.787        | 19.053        | 21.903        |
| AtlasNet+SAUM | <b>23.735</b> | <b>25.241</b> | <b>22.716</b> | <b>25.627</b> | <b>22.261</b> | <b>18.168</b> | <b>10.744</b> | <b>16.696</b> | <b>20.649</b> |
| PCN           | 24.734        | <b>24.775</b> | <b>23.160</b> | 26.040        | 25.870        | 18.006        | 11.318        | 18.890        | 21.600        |
| PCN+SAUM      | <b>22.556</b> | 24.926        | 24.082        | <b>24.982</b> | <b>22.347</b> | <b>17.917</b> | <b>10.142</b> | <b>16.243</b> | <b>20.400</b> |
| TopNet        | 24.918        | 25.518        | <b>23.298</b> | 26.216        | 25.422        | <b>17.978</b> | 11.640        | 19.175        | 21.770        |
| TopNet+SAUM   | <b>22.651</b> | <b>25.104</b> | 24.284        | <b>24.399</b> | <b>21.053</b> | 18.077        | <b>10.527</b> | <b>16.346</b> | <b>20.305</b> |

Table 4: Quantitative results on the TopNet dataset. The Chamfer Distance (CD) multiplied by  $10^3$  is reported. The lower the CD, the better. Better results are in bold.

| Methods       | Chair        | Table        | Sofa         | Cabinet       | Lamp          | Car          | Airplane     | Vessel       | Avg          |
|---------------|--------------|--------------|--------------|---------------|---------------|--------------|--------------|--------------|--------------|
| FCAE          | 17.329       | 14.659       | 13.651       | 21.749        | 25.157        | 8.075        | 6.967        | 10.264       | 14.731       |
| FCAE+SAUM     | <b>9.112</b> | <b>9.870</b> | <b>7.368</b> | <b>10.500</b> | <b>14.003</b> | <b>5.404</b> | <b>5.077</b> | <b>7.247</b> | <b>8.573</b> |
| AtlasNet      | 11.361       | 12.152       | 9.411        | 13.623        | 19.172        | 5.812        | 5.271        | 9.203        | 10.751       |
| AtlasNet+SAUM | <b>8.871</b> | <b>9.521</b> | <b>6.904</b> | <b>9.348</b>  | <b>12.195</b> | <b>5.253</b> | <b>5.227</b> | <b>6.717</b> | <b>8.004</b> |
| PCN           | 10.902       | 11.434       | 8.826        | 13.019        | 18.392        | 5.982        | 5.773        | 8.226        | 10.319       |
| PCN+SAUM      | <b>8.500</b> | <b>9.594</b> | <b>7.514</b> | <b>9.303</b>  | <b>11.881</b> | <b>5.453</b> | <b>4.137</b> | <b>6.396</b> | <b>7.847</b> |
| TopNet        | 12.360       | 11.573       | 9.235        | 13.180        | 19.311        | 5.752        | 6.063        | 9.031        | 10.813       |
| TopNet+SAUM   | <b>8.899</b> | <b>9.105</b> | <b>7.429</b> | <b>8.888</b>  | <b>11.812</b> | <b>5.318</b> | <b>4.603</b> | <b>6.562</b> | <b>7.827</b> |

Table 5: Quantitative results on the TopNet dataset. The Earth Mover’s Distance (EMD) multiplied by  $10^2$  is reported. The lower the EMD, the better. Better results are in bold.

| Methods       | Chair        | Table        | Sofa         | Cabinet      | Lamp         | Car          | Airplane     | Vessel       | Avg          |
|---------------|--------------|--------------|--------------|--------------|--------------|--------------|--------------|--------------|--------------|
| FCAE          | 0.522        | 0.560        | 0.483        | 0.410        | 0.534        | 0.684        | 0.895        | 0.684        | 0.597        |
| FCAE+SAUM     | <b>0.582</b> | <b>0.605</b> | <b>0.546</b> | <b>0.479</b> | <b>0.654</b> | <b>0.689</b> | <b>0.920</b> | <b>0.758</b> | <b>0.654</b> |
| AtlasNet      | 0.545        | 0.571        | 0.508        | 0.444        | 0.558        | 0.677        | 0.893        | 0.696        | 0.612        |
| AtlasNet+SAUM | <b>0.586</b> | <b>0.605</b> | <b>0.549</b> | <b>0.475</b> | <b>0.660</b> | 0.677        | <b>0.915</b> | <b>0.764</b> | <b>0.654</b> |
| PCN           | 0.542        | 0.588        | 0.512        | 0.469        | 0.567        | 0.685        | 0.900        | 0.701        | 0.620        |
| PCN+SAUM      | <b>0.606</b> | <b>0.626</b> | <b>0.544</b> | <b>0.491</b> | <b>0.665</b> | 0.685        | <b>0.928</b> | <b>0.773</b> | <b>0.665</b> |
| TopNet        | 0.533        | 0.572        | 0.504        | 0.455        | 0.564        | <b>0.685</b> | 0.894        | 0.686        | 0.612        |
| TopNet+SAUM   | <b>0.601</b> | <b>0.625</b> | <b>0.544</b> | <b>0.498</b> | <b>0.686</b> | 0.677        | <b>0.919</b> | <b>0.775</b> | <b>0.666</b> |

Table 6: Quantitative results on the TopNet dataset. The F-Score is reported. The higher the F-Score, the better. Better results are in bold.

## 2.2 Self-Consistency Test

| Methods       | Chair        | Table        | Sofa         | Cabinet      | Lamp         | Car          | Airplane     | Vessel       | Avg          |
|---------------|--------------|--------------|--------------|--------------|--------------|--------------|--------------|--------------|--------------|
| FCAE          | 9.850        | 8.795        | 9.660        | 9.542        | 10.678       | 8.356        | 5.258        | 9.347        | 8.936        |
| FCAE+SAUM     | <b>6.645</b> | <b>7.072</b> | <b>8.569</b> | <b>7.420</b> | <b>7.106</b> | <b>6.372</b> | <b>3.576</b> | <b>6.123</b> | <b>6.610</b> |
| AtlasNet      | 9.533        | 8.534        | 9.357        | 9.779        | 10.245       | 8.463        | 5.209        | 9.285        | 8.801        |
| AtlasNet+SAUM | <b>6.530</b> | <b>7.067</b> | <b>8.191</b> | <b>7.168</b> | <b>6.632</b> | <b>6.514</b> | <b>3.586</b> | <b>6.066</b> | <b>6.469</b> |
| PCN           | 9.516        | 8.264        | 9.513        | 9.383        | 10.874       | 8.147        | 5.038        | 9.208        | 8.743        |
| PCN+SAUM      | <b>6.662</b> | <b>6.855</b> | <b>8.132</b> | <b>6.856</b> | <b>7.056</b> | <b>6.300</b> | <b>3.605</b> | <b>6.396</b> | <b>6.483</b> |
| TopNet        | 9.378        | 8.364        | 9.622        | 9.514        | 10.715       | 8.439        | 5.067        | 8.937        | 8.754        |
| TopNet+SAUM   | <b>6.114</b> | <b>6.482</b> | <b>7.830</b> | <b>7.115</b> | <b>6.090</b> | <b>6.269</b> | <b>3.468</b> | <b>5.680</b> | <b>6.131</b> |

Table 7: Self-consistency test on the PCN dataset. The Chamfer Distance (CD) multiplied by  $10^3$  is reported. The lower the CD, the better. Better results are in bold.

| Methods       | Chair        | Table        | Sofa         | Cabinet      | Lamp         | Car          | Airplane     | Vessel       | Avg          |
|---------------|--------------|--------------|--------------|--------------|--------------|--------------|--------------|--------------|--------------|
| FCAE          | 18.669       | 14.664       | 19.043       | 21.229       | 23.969       | 15.856       | 7.192        | 14.188       | 16.851       |
| FCAE+SAUM     | <b>3.494</b> | <b>3.475</b> | <b>4.165</b> | <b>3.463</b> | <b>4.920</b> | <b>2.943</b> | <b>2.572</b> | <b>3.155</b> | <b>3.523</b> |
| AtlasNet      | 21.001       | 15.387       | 15.953       | 21.945       | 28.960       | 11.419       | 11.315       | 13.675       | 17.457       |
| AtlasNet+SAUM | <b>3.480</b> | <b>3.598</b> | <b>4.163</b> | <b>3.480</b> | <b>4.713</b> | <b>3.008</b> | <b>2.731</b> | <b>3.170</b> | <b>3.543</b> |
| PCN           | 8.018        | 7.985        | 6.700        | 9.078        | 16.662       | 5.607        | 4.436        | 7.359        | 8.231        |
| PCN+SAUM      | <b>3.767</b> | <b>3.826</b> | <b>4.294</b> | <b>3.466</b> | <b>5.355</b> | <b>3.012</b> | <b>2.704</b> | <b>3.310</b> | <b>3.717</b> |
| TopNet        | 12.319       | 9.069        | 9.209        | 10.925       | 22.418       | 8.743        | 8.470        | 12.074       | 11.653       |
| TopNet+SAUM   | <b>3.431</b> | <b>3.704</b> | <b>4.033</b> | <b>3.548</b> | <b>4.431</b> | <b>2.847</b> | <b>2.349</b> | <b>3.019</b> | <b>3.420</b> |

Table 8: Self-consistency test on the PCN dataset. The Earth Mover’s Distance (EMD) multiplied by  $10^2$  is reported. The lower the EMD, the better. Better results are in bold.

| Methods       | Chair        | Table        | Sofa         | Cabinet      | Lamp         | Car          | Airplane     | Vessel       | Avg          |
|---------------|--------------|--------------|--------------|--------------|--------------|--------------|--------------|--------------|--------------|
| FCAE          | 0.641        | 0.701        | 0.625        | 0.637        | 0.608        | 0.735        | 0.895        | 0.690        | 0.692        |
| FCAE+SAUM     | <b>0.861</b> | <b>0.883</b> | <b>0.830</b> | <b>0.825</b> | <b>0.848</b> | <b>0.871</b> | <b>0.959</b> | <b>0.878</b> | <b>0.869</b> |
| AtlasNet      | 0.685        | 0.745        | 0.681        | 0.646        | 0.660        | 0.730        | 0.896        | 0.703        | 0.718        |
| AtlasNet+SAUM | <b>0.871</b> | <b>0.887</b> | <b>0.846</b> | <b>0.839</b> | <b>0.872</b> | <b>0.863</b> | <b>0.958</b> | <b>0.879</b> | <b>0.877</b> |
| PCN           | 0.693        | 0.754        | 0.681        | 0.689        | 0.656        | 0.754        | 0.902        | 0.711        | 0.730        |
| PCN+SAUM      | <b>0.851</b> | <b>0.888</b> | <b>0.832</b> | <b>0.852</b> | <b>0.840</b> | <b>0.867</b> | <b>0.953</b> | <b>0.856</b> | <b>0.868</b> |
| TopNet        | 0.675        | 0.740        | 0.660        | 0.670        | 0.611        | 0.717        | 0.903        | 0.697        | 0.709        |
| TopNet+SAUM   | <b>0.891</b> | <b>0.904</b> | <b>0.853</b> | <b>0.842</b> | <b>0.890</b> | <b>0.881</b> | <b>0.969</b> | <b>0.902</b> | <b>0.892</b> |

Table 9: Self-consistency test on the PCN dataset. The F-Score is reported. The higher the F-Score, the better. Better results are in bold.

### 2.3 Ablation Study

| Methods                      | Chair         | Table        | Sofa          | Cabinet       | Lamp         | Car           | Airplane     | Vessel       | Avg          |
|------------------------------|---------------|--------------|---------------|---------------|--------------|---------------|--------------|--------------|--------------|
| SAUM ( $\times 4$ ) only     | 12.298        | 10.439       | 14.089        | 13.113        | 8.766        | 12.733        | 6.687        | 9.300        | 10.928       |
| SAUM ( $\times 8$ ) only     | <b>10.736</b> | <b>9.105</b> | <b>13.252</b> | <b>11.884</b> | <b>8.023</b> | <b>11.602</b> | <b>5.850</b> | <b>8.200</b> | <b>9.832</b> |
| FCAE                         | 10.969        | 9.320        | 11.756        | 11.023        | 11.131       | 8.775         | 5.698        | 9.720        | 9.799        |
| FCAE+SAUM ( $\times 4$ )     | 9.604         | 8.269        | <b>11.096</b> | 10.153        | 9.335        | <b>8.448</b>  | 5.334        | 8.286        | 8.816        |
| FCAE+SAUM ( $\times 8$ )     | <b>9.524</b>  | <b>8.011</b> | 11.115        | <b>10.105</b> | <b>8.848</b> | 8.515         | <b>5.088</b> | <b>8.141</b> | <b>8.668</b> |
| AtlasNet                     | 10.803        | 8.979        | 11.472        | 10.946        | 11.212       | 9.009         | 5.757        | 9.740        | 9.739        |
| AtlasNet+SAUM ( $\times 4$ ) | 9.686         | <b>8.114</b> | <b>10.986</b> | 10.502        | 8.682        | <b>8.692</b>  | 5.124        | 8.259        | 8.756        |
| AtlasNet+SAUM ( $\times 8$ ) | <b>9.604</b>  | 8.273        | 11.279        | <b>10.310</b> | <b>8.553</b> | 8.752         | <b>4.995</b> | <b>8.032</b> | <b>8.725</b> |
| PCN                          | 10.998        | 8.590        | 11.676        | 10.625        | 11.339       | 8.696         | 5.502        | 9.665        | 9.636        |
| PCN+SAUM ( $\times 4$ )      | 10.227        | <b>7.945</b> | <b>11.379</b> | <b>9.968</b>  | 9.498        | <b>8.543</b>  | 5.145        | <b>8.476</b> | <b>8.898</b> |
| PCN+SAUM ( $\times 8$ )      | <b>10.024</b> | 8.148        | 11.452        | 10.149        | <b>9.228</b> | 8.645         | <b>5.017</b> | 8.540        | 8.900        |
| TopNet                       | 10.664        | 8.756        | 11.682        | 10.624        | 11.210       | 8.948         | 5.659        | 9.551        | 9.637        |
| TopNet+SAUM ( $\times 4$ )   | 9.897         | 7.709        | 11.466        | 10.310        | 8.998        | 8.624         | 5.200        | 8.078        | 8.785        |
| TopNet+SAUM ( $\times 8$ )   | <b>9.079</b>  | <b>7.677</b> | <b>11.055</b> | <b>10.038</b> | <b>7.564</b> | <b>8.570</b>  | <b>4.975</b> | <b>7.568</b> | <b>8.316</b> |

Table 10: Ablation study on the PCN dataset. The Chamfer Distance (CD) multiplied by  $10^3$  is reported. The lower the CD, the better. Better results are in bold.

| Methods                      | Chair         | Table         | Sofa          | Cabinet       | Lamp          | Car           | Airplane      | Vessel        | Avg           |
|------------------------------|---------------|---------------|---------------|---------------|---------------|---------------|---------------|---------------|---------------|
| SAUM ( $\times 4$ ) only     | 36.645        | 39.768        | 37.998        | 39.328        | 33.913        | 29.169        | 21.293        | 27.196        | 33.164        |
| SAUM ( $\times 8$ ) only     | <b>26.197</b> | <b>26.546</b> | <b>27.991</b> | <b>26.043</b> | <b>22.820</b> | <b>19.521</b> | <b>16.585</b> | <b>18.946</b> | <b>23.081</b> |
| FCAE                         | 18.973        | 16.112        | 19.149        | 21.472        | 24.055        | 15.730        | 7.356         | 14.178        | 17.128        |
| FCAE+SAUM ( $\times 4$ )     | 17.517        | 12.350        | 16.110        | 17.185        | 20.778        | 11.191        | 8.435         | 11.494        | 14.383        |
| FCAE+SAUM ( $\times 8$ )     | <b>8.951</b>  | <b>7.158</b>  | <b>10.306</b> | <b>9.779</b>  | <b>12.811</b> | <b>7.968</b>  | <b>6.627</b>  | <b>8.522</b>  | <b>9.015</b>  |
| AtlasNet                     | 22.547        | 16.296        | 17.886        | 23.167        | 29.198        | 11.695        | 11.678        | 13.894        | 18.295        |
| AtlasNet+SAUM ( $\times 4$ ) | 16.436        | 11.267        | 13.466        | 16.226        | 21.163        | 8.073         | 10.901        | 10.282        | 13.477        |
| AtlasNet+SAUM ( $\times 8$ ) | <b>8.592</b>  | <b>6.776</b>  | <b>9.254</b>  | <b>9.442</b>  | <b>13.146</b> | <b>6.315</b>  | <b>5.917</b>  | <b>8.043</b>  | <b>8.436</b>  |
| PCN                          | 8.679         | 8.078         | 8.342         | 9.769         | 16.954        | 5.718         | 4.664         | 7.509         | 8.714         |
| PCN+SAUM ( $\times 4$ )      | 7.413         | 6.529         | 7.837         | 7.886         | 12.038        | 5.796         | 4.693         | 6.738         | 7.366         |
| PCN+SAUM ( $\times 8$ )      | <b>6.628</b>  | <b>6.017</b>  | <b>7.308</b>  | <b>7.180</b>  | <b>9.852</b>  | <b>5.576</b>  | <b>4.493</b>  | <b>5.990</b>  | <b>6.631</b>  |
| TopNet                       | 13.738        | 9.707         | 11.816        | 11.374        | 22.523        | 7.831         | <b>8.620</b>  | 12.037        | 12.206        |
| TopNet+SAUM ( $\times 4$ )   | <b>11.187</b> | 8.478         | 11.421        | 9.838         | 21.379        | 7.983         | 8.982         | 11.741        | 11.376        |
| TopNet+SAUM ( $\times 8$ )   | 14.079        | <b>7.634</b>  | <b>11.377</b> | <b>8.336</b>  | <b>15.297</b> | <b>7.034</b>  | 10.215        | <b>9.796</b>  | <b>10.471</b> |

Table 11: Ablation study on the PCN dataset. The Earth Mover’s Distance (EMD) multiplied by  $10^2$  is reported. The lower the EMD, the better. Better results are in bold.

| Methods                      | Chair        | Table        | Sofa         | Cabinet      | Lamp         | Car          | Airplane     | Vessel       | Avg          |
|------------------------------|--------------|--------------|--------------|--------------|--------------|--------------|--------------|--------------|--------------|
| SAUM ( $\times 4$ ) only     | 0.552        | 0.622        | 0.401        | 0.464        | 0.748        | 0.478        | 0.796        | 0.653        | 0.589        |
| SAUM ( $\times 8$ ) only     | <b>0.616</b> | <b>0.706</b> | <b>0.466</b> | <b>0.556</b> | <b>0.781</b> | <b>0.554</b> | <b>0.857</b> | <b>0.731</b> | <b>0.658</b> |
| FCAE                         | 0.576        | 0.697        | 0.509        | 0.574        | 0.594        | 0.706        | 0.876        | 0.672        | 0.651        |
| FCAE+SAUM ( $\times 4$ )     | 0.675        | 0.788        | 0.570        | 0.632        | 0.721        | 0.730        | 0.894        | 0.761        | 0.721        |
| FCAE+SAUM ( $\times 8$ )     | <b>0.702</b> | <b>0.814</b> | <b>0.604</b> | <b>0.660</b> | <b>0.760</b> | <b>0.735</b> | <b>0.906</b> | <b>0.775</b> | <b>0.745</b> |
| AtlasNet                     | 0.610        | 0.734        | 0.544        | 0.594        | 0.617        | 0.698        | 0.869        | 0.682        | 0.669        |
| AtlasNet+SAUM ( $\times 4$ ) | 0.686        | 0.803        | 0.593        | 0.639        | 0.754        | 0.721        | 0.902        | 0.760        | 0.732        |
| AtlasNet+SAUM ( $\times 8$ ) | <b>0.704</b> | <b>0.807</b> | <b>0.616</b> | <b>0.659</b> | <b>0.773</b> | <b>0.725</b> | <b>0.909</b> | <b>0.780</b> | <b>0.747</b> |
| PCN                          | 0.625        | 0.765        | 0.581        | 0.651        | 0.638        | 0.725        | 0.881        | 0.697        | 0.695        |
| PCN+SAUM ( $\times 4$ )      | 0.676        | <b>0.811</b> | 0.609        | <b>0.687</b> | 0.721        | <b>0.736</b> | 0.899        | 0.755        | 0.737        |
| PCN+SAUM ( $\times 8$ )      | <b>0.686</b> | 0.809        | <b>0.616</b> | 0.681        | <b>0.739</b> | 0.734        | <b>0.906</b> | <b>0.759</b> | <b>0.741</b> |
| TopNet                       | 0.602        | 0.742        | 0.542        | 0.624        | 0.594        | 0.696        | 0.874        | 0.673        | 0.668        |
| TopNet+SAUM ( $\times 4$ )   | 0.676        | 0.817        | 0.593        | 0.655        | 0.728        | 0.719        | 0.897        | 0.766        | 0.731        |
| TopNet+SAUM ( $\times 8$ )   | <b>0.710</b> | <b>0.821</b> | <b>0.605</b> | <b>0.674</b> | <b>0.808</b> | <b>0.731</b> | <b>0.907</b> | <b>0.794</b> | <b>0.756</b> |

Table 12: Ablation study on the PCN dataset. The F-Score is reported. The higher the F-Score, the better. Better results are in bold.
